# Supplementary material for: An efficient one-step condensation and activation strategy to synthesize porous carbons with optimal micropore sizes for highly selective CO2 adsorption
Source: Royal Society of Chemistry journal article supplement (doi:10.1039/c3nr05825e), 2014-01-01
Supplement: c3nr05825e.pdf [file c3nr05825e.pdf]

**An efficient one-step condensation and activation strategy to  
synthesize porous carbons with optimal micropore sizes for highly  
selective CO<sub>2</sub> adsorption**

Jiacheng Wang\* and Qian Liu\*

State Key Laboratory of High Performance Ceramics and Superfine Microstructure, Shanghai  
Institute of Ceramics, Chinese Academy of Sciences, Shanghai 200050, P. R. China. Tel:  
0086-21-52412612; Email: jiacheng.wang@mail.sic.ac.cn; qianliu@sunm.shenc.ac.cn

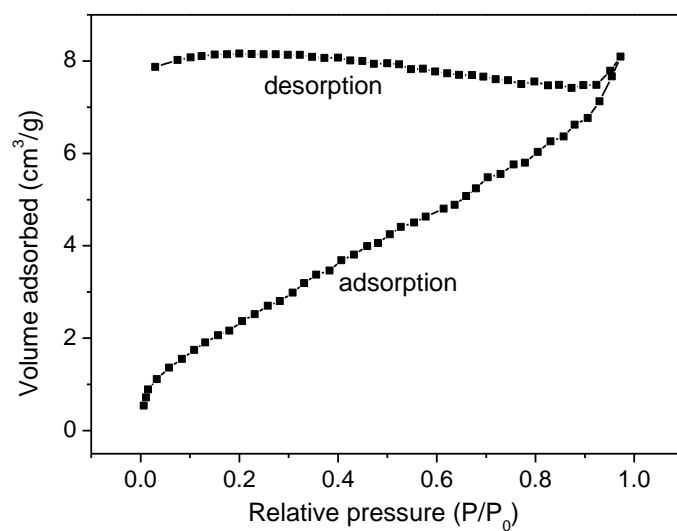

**Fig. S1** Nitrogen adsorption-desorption isotherms of the resulting carbon prepared by direct carbonization of the ground *m*-phenylenediamine and terephthalaldehyde mixture. The specific surface area determined by the BET method is  $\sim 7 \text{ m}^2/\text{g}$ .

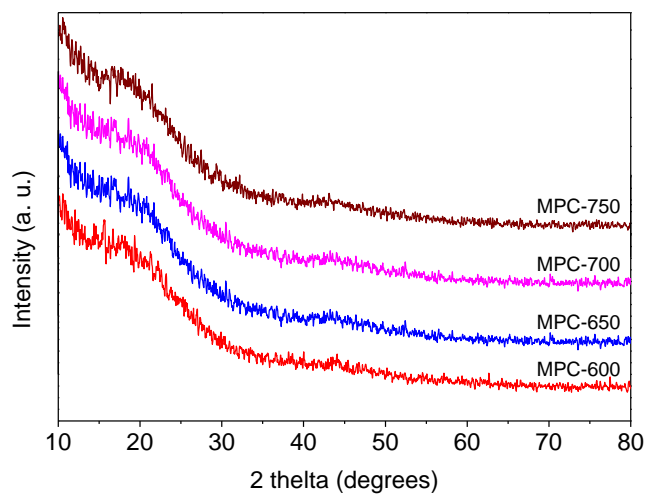

**Fig. S2** Powder XRD patterns of various MPCs prepared at different temperatures.

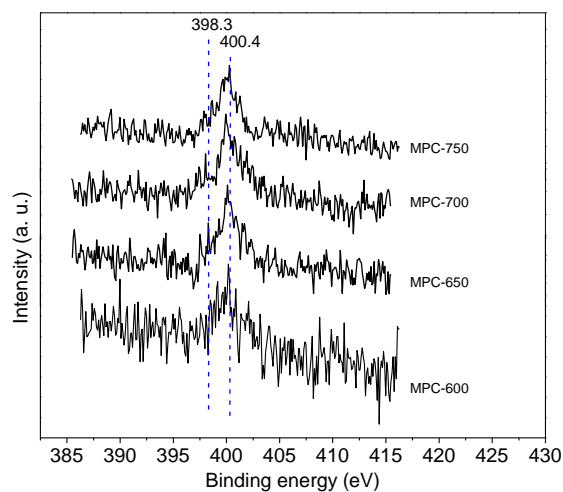

**Fig. S3** N1s XPS spectra of various MPCs prepared at different temperatures.

**Table S1.** Elemental analysis of various MPCs determined by XPS analysis.

| Sample  | N [wt%] | C [wt%] |
|---------|---------|---------|
| MPC-600 | 0.66    | 93.3    |
| MPC-650 | 0.81    | 91.1    |
| MPC-700 | 0.78    | 92.7    |
| MPC-750 | 0.33    | 96.3    |

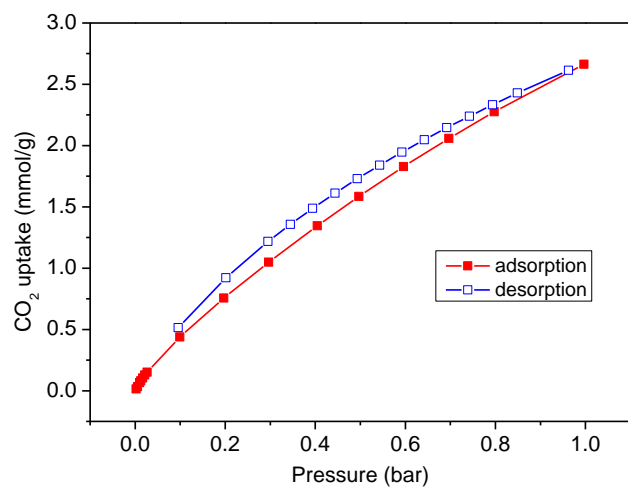

**Fig. S4** CO<sub>2</sub> sorption isotherms of MPC-600 at 25 °C.

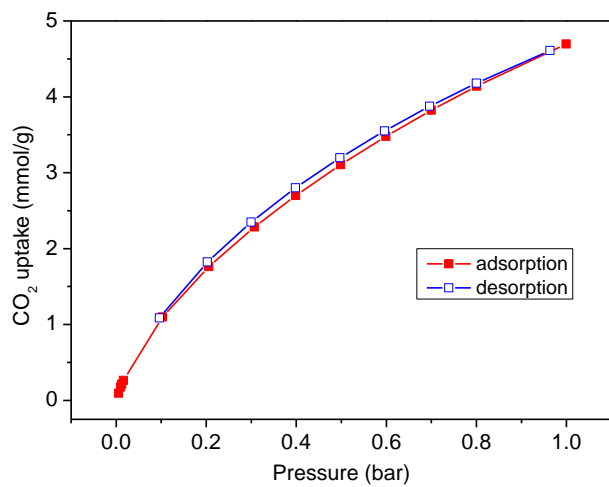

**Fig. S5** CO<sub>2</sub> sorption isotherms of MPC-600 at 0 °C.

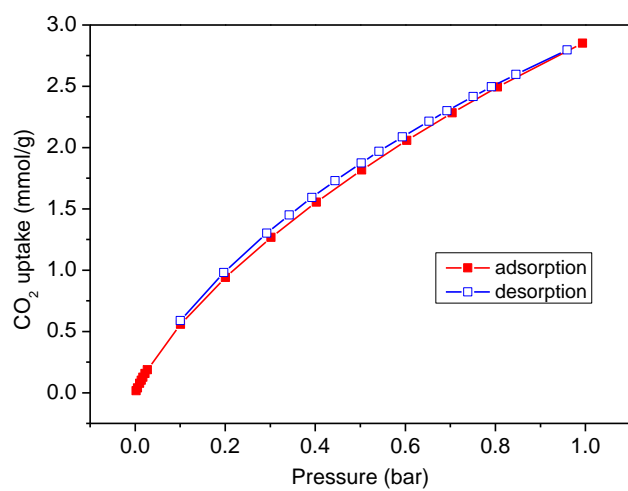

**Fig. S6** CO<sub>2</sub> sorption isotherms of MPC-650 at 25 °C.

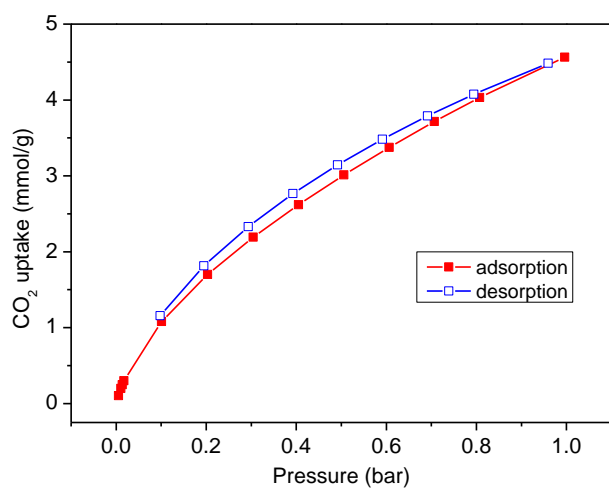

**Fig. S7** CO<sub>2</sub> sorption isotherms of MPC-650 at 0 °C.

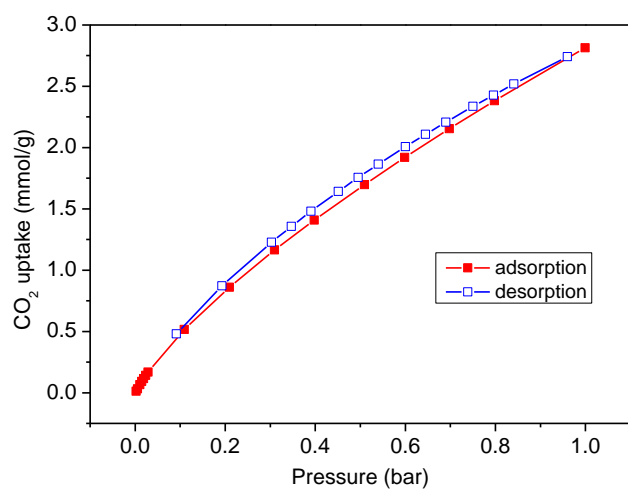

**Fig. S8** CO<sub>2</sub> sorption isotherms of MPC-700 at 25 °C.

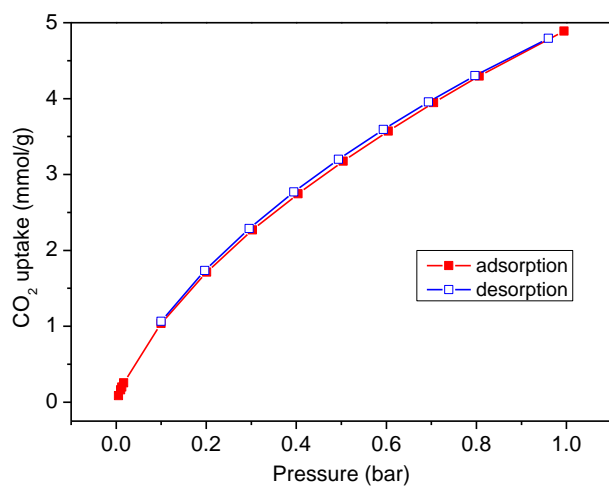

**Fig. S9** CO<sub>2</sub> sorption isotherms of MPC-700 at 0 °C.

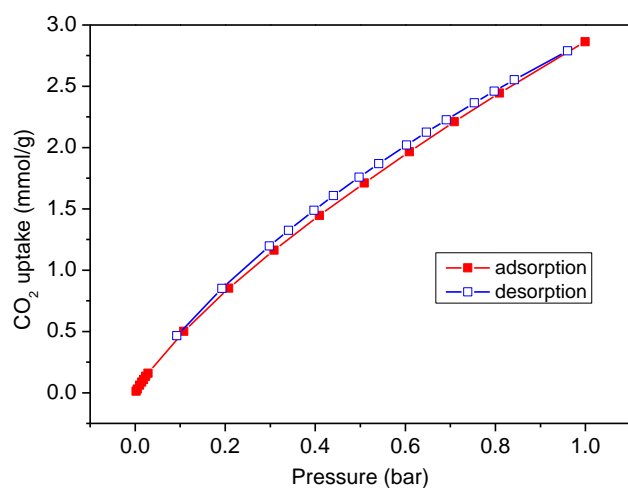

**Fig. S10** CO<sub>2</sub> sorption isotherms of MPC-750 at 25 °C.

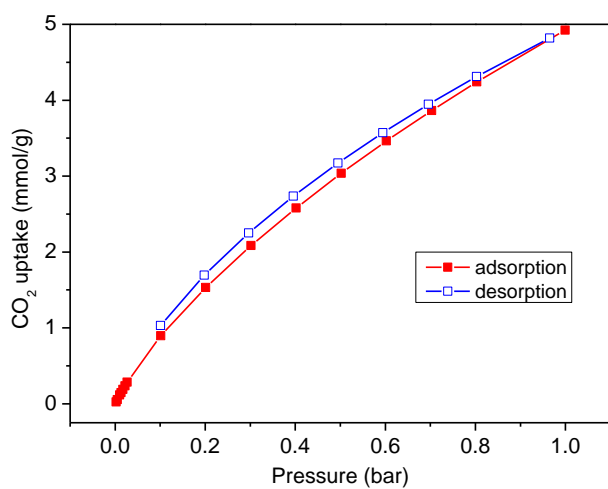

**Fig. S11** CO<sub>2</sub> sorption isotherms of MPC-750 at 0 °C.



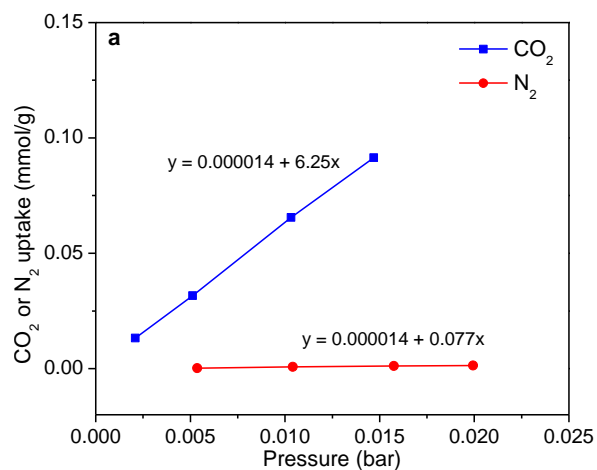

**Fig. S12** Initial slopes from CO<sub>2</sub> and N<sub>2</sub> adsorption isotherms at 25 °C for MPC-700.

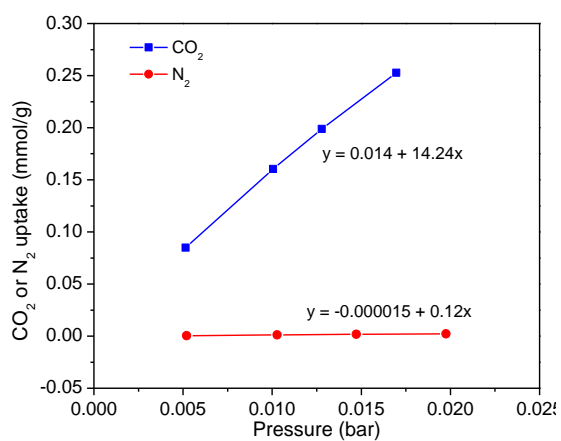

**Fig. S13** Initial slopes from CO<sub>2</sub> and N<sub>2</sub> adsorption isotherms at 0 °C for MPC-700.
